# Supplementary material for: High-throughput Sequencing Analysis of the Actinobacterial Apatial Diversity in Moonmilk Deposits
Source: Preprints.org preprint supplement (doi:10.20944/preprints201802.0090.v1), 2018-02-12
Supplement: Supplementary file 1 [file supplementary]

**Table S1.** Details of the PCR primers used for community profiling of moonmilk samples **(a)** and - PCR conditions used for 16S rRNA amplification from moonmilk samples **(b)**.

**a)**

| Target organism       | Primer name    | Adapter sequence *            | Primer sequence             | Variable region | Size of amplicon | Reference |
|-----------------------|----------------|-------------------------------|-----------------------------|-----------------|------------------|-----------|
| <b>Bacteria</b>       | 515F (BcF)     | TCGTCGGCAGCGTCAGATGTGTATAAGAG | 5'-GCCAGCAGCCGCGGTAA- 3'    | V4 - V6         | ~550 nt          | [29]      |
|                       | 1061R (BcR)    | GTCTCGTGGGCTCGGAGATGTGTATAAGA | 5'-CRRACAGAGCTGACGAC- 3'    |                 |                  |           |
| <b>Actinobacteria</b> | Com2xf (ActF)  | TCGTCGGCAGCGTCAGATGTGTATAAGAG | 5'-AAACTCAAAGGAATTGACGG- 3' | V6 - V7         | ~270 nt          | [30]      |
|                       | Ac1186r (ActR) | GTCTCGTGGGCTCGGAGATGTGTATAAGA | 5'-CTTCCTCCGAGTTGACCC- 3'   |                 |                  |           |

\*overhanging adapters were added at 5'-end before specific primer sequence

**b)**

| Target organism       | Predenaturation | Denaturation | Anealing   | Extension  | Final extension | Nr of cycles |
|-----------------------|-----------------|--------------|------------|------------|-----------------|--------------|
| <b>Bacteria</b>       | 98°C - 30s      | 98°C - 50s   | 54°C - 30s | 72°C - 30s | 72°C - 2min     | 22           |
| <b>Actinobacteria</b> |                 |              | 55°C - 30s |            |                 | 26           |

**Table S2.** Relative abundance (%) of bacterial phyla identified in the three moonmilk deposits in “Grotte des Collemboles”. Low-abundant taxa with relative abundance <1% are marked in red.

| Bacterial phyla          | COL1        | COL3        | COL4        | Mean        | Standard deviation |
|--------------------------|-------------|-------------|-------------|-------------|--------------------|
| Proteobacteria           | 52.0        | 34.1        | 30.3        | 38.8        | 11.6               |
| Actinobacteria           | 9.3         | 23.4        | 10.4        | 14.4        | 7.9                |
| Acidobacteria            | 9.1         | 8.8         | 13.5        | 10.5        | 2.6                |
| Chloroflexi              | 6.2         | 10.0        | 11.3        | 9.2         | 2.7                |
| Nitrospirae              | 6.8         | 4.6         | 7.2         | 6.2         | 1.4                |
| Gemmatimonadetes         | 3.4         | 7.1         | 7.6         | 6.1         | 2.3                |
| Planctomycetes           | 3.4         | 4.1         | 5.5         | 4.3         | 1.1                |
| Latescibacteria          | 1.3         | 0.9         | 1.6         | 1.3         | 0.4                |
| Bacteroidetes            | 0.3         | 0.7         | 1.3         | 0.8         | 0.5                |
| Verrucomicrobia          | 0.5         | 0.4         | 0.9         | 0.6         | 0.3                |
| Armatimonadetes          | 0.4         | 0.2         | 0.8         | 0.5         | 0.3                |
| <b>Tectomicrobia</b>     | <b>0.4</b>  | <b>0.4</b>  | <b>0.4</b>  | <b>0.4</b>  | <b>0.0</b>         |
| RBG-1_Zixibacteria       | 0.4         | 0.2         | 0.5         | 0.4         | 0.2                |
| Parcubacteria            | 0.3         | 0.2         | 0.5         | 0.3         | 0.2                |
| <b>Ignavibacteriae</b>   | <b>0.4</b>  | <b>0.3</b>  | <b>0.3</b>  | <b>0.3</b>  | <b>0.0</b>         |
| <b>Chlorobi</b>          | <b>0.1</b>  | <b>0.2</b>  | <b>0.4</b>  | <b>0.3</b>  | <b>0.1</b>         |
| <b>Firmicutes</b>        | <b>0.4</b>  | <b>0.2</b>  | <b>0.1</b>  | <b>0.2</b>  | <b>0.2</b>         |
| <b>Elusimicrobia</b>     | <b>0.2</b>  | <b>0.2</b>  | <b>0.3</b>  | <b>0.2</b>  | <b>0.1</b>         |
| <b>Omnitrophica</b>      | <b>0.1</b>  | <b>0.1</b>  | <b>0.3</b>  | <b>0.2</b>  | <b>0.1</b>         |
| <b>Saccharibacteria</b>  | <b>0.2</b>  | <b>0.1</b>  | <b>0.1</b>  | <b>0.2</b>  | <b>0.1</b>         |
| <b>Peregrinibacteria</b> | <b>0.1</b>  | <b>0.1</b>  | <b>0.3</b>  | <b>0.1</b>  | <b>0.1</b>         |
| <b>Chlamydiae</b>        | <b>0.2</b>  | <b>0.1</b>  | <b>0.2</b>  | <b>0.1</b>  | <b>0.1</b>         |
| <b>TM6_Dependentiae</b>  | <b>0.2</b>  | <b>0.04</b> | <b>0.2</b>  | <b>0.1</b>  | <b>0.1</b>         |
| <b>GAL15</b>             | <b>0.1</b>  | <b>0.1</b>  | <b>0.2</b>  | <b>0.1</b>  | <b>0.1</b>         |
| <b>SBR1093</b>           | <b>0.05</b> | <b>0.02</b> | <b>0.1</b>  | <b>0.1</b>  | <b>0.1</b>         |
| <b>Microgenomates</b>    | <b>0.1</b>  | <b>0.1</b>  | <b>0.1</b>  | <b>0.1</b>  | <b>0.01</b>        |
| <b>Hydrogenedentes</b>   | <b>0.02</b> | <b>0.04</b> | <b>0.1</b>  | <b>0.04</b> | <b>0.02</b>        |
| <b>Cyanobacteria</b>     | <b>0.03</b> | <b>0.01</b> | <b>0.1</b>  | <b>0.04</b> | <b>0.03</b>        |
| <b>PAUC34f</b>           | <b>0.03</b> | <b>0.01</b> | <b>0.1</b>  | <b>0.04</b> | <b>0.02</b>        |
| <b>WS2</b>               | <b>0.03</b> | <b>0.02</b> | <b>0.03</b> | <b>0.03</b> | <b>0.01</b>        |
| <b>BRC1</b>              | <b>0.01</b> | <b>0.01</b> | <b>0.1</b>  | <b>0.03</b> | <b>0.03</b>        |
| <b>Fibrobacteres</b>     | <b>0.01</b> | <b>0</b>    | <b>0.02</b> | <b>0.01</b> | <b>0.01</b>        |
| <b>Lentisphaerae</b>     | <b>0.02</b> | <b>0</b>    | <b>0.01</b> | <b>0.01</b> | <b>0.01</b>        |

|                        |      |     |       |       |       |
|------------------------|------|-----|-------|-------|-------|
| Deferribacteres        | 0.00 | 0   | 0.02  | 0.01  | 0.01  |
| BJ-169                 | 0.02 | 0   | 0     | 0.01  | 0.01  |
| Spirochaetae           | 0    | 0   | 0.01  | 0.005 | 0.01  |
| FCPU426                | 0    | 0   | 0.01  | 0.002 | 0.004 |
| Gracilibacteria        | 0    | 0   | 0.005 | 0.002 | 0.003 |
| SR1_Absconditabacteria | 0    | 0   | 0.005 | 0.002 | 0.003 |
| unclassified           | 3.9  | 3.4 | 5.0   | 4.1   | 0.9   |

**Table S3.** Relative abundance (%) of the phylum Actinobacteria at different taxonomic levels identified in the three moonmilk deposits in the “Grotte des Collemboles”.

|               |                     | COL1   | COL3  | COL4  | Mean  |
|---------------|---------------------|--------|-------|-------|-------|
| <b>Class</b>  | Thermoleophilia     | 0.0056 | 0.008 | 0.023 | 0.01  |
| <b>Order</b>  | Gaiellales          | 0.0056 | 0.008 | 0.023 | 0.01  |
| <b>Family</b> | Gaiellaceae         | 0.0021 | 0.005 | 0.015 | 0.007 |
|               | uncultured          | 0.0035 | 0.003 | 0.008 | 0.005 |
| <b>Class</b>  | Acidimicrobiia      | 26.72  | 9.77  | 55.32 | 30.6  |
| <b>Order</b>  | Acidimicrobiales    | 26.72  | 9.77  | 55.32 | 30.6  |
| <b>Family</b> | uncultured          | 24.77  | 8.56  | 51.6  | 28.3  |
|               | Acidimicrobiaceae   | 1.16   | 0.67  | 2.22  | 1.4   |
|               | Iamiaceae           | 0.79   | 0.54  | 1.5   | 0.9   |
| <b>Class</b>  | Actinobacteria      | 72.75  | 90    | 42.98 | 68.6  |
| <b>Order</b>  | Pseudonocardiales   | 14.79  | 75.3  | 28.55 | 39.5  |
|               | Corynebacteriales   | 41     | 10.09 | 4.23  | 18.4  |
|               | Streptomycetales    | 5.37   | 0.76  | 3.01  | 3.0   |
|               | Micrococcales       | 3.76   | 2.14  | 2.18  | 2.7   |
|               | Frankiales          | 1.39   | 0.46  | 1.97  | 1.3   |
|               | Propionibacteriales | 2.03   | 0.25  | 0.48  | 0.9   |
|               | Micromonosporales   | 1.44   | 0.52  | 0.58  | 0.8   |
|               | Streptosporangiales | 1.98   | 0.24  | 0.1   | 0.8   |
|               | unclassified        | 0.38   | 0.04  | 0.96  | 0.5   |
|               | Geodermatophilales  | 0.09   | 0.14  | 0.78  | 0.3   |
|               | Nakamurellales      | 0.29   | 0.07  | 0.07  | 0.1   |
|               | Actinomycetales     | 0.17   | 0.001 | 0.004 | 0.1   |
|               | Glycomycetales      | 0.02   | 0     | 0.04  | 0.02  |
|               | Kineosporiales      | 0.03   | 0     | 0.01  | 0.01  |
|               | Acidothermales      | 0      | 0     | 0.02  | 0.007 |

|               |                       |       |      |       |        |
|---------------|-----------------------|-------|------|-------|--------|
|               | Catenulisporales      | 0     | 0    | 0.001 | 0.0003 |
| <b>Family</b> | Pseudonocardiaceae    | 14.79 | 75.3 | 28.55 | 39.5   |
|               | Nocardiaceae          | 39.5  | 9.94 | 3.84  | 17.8   |
|               | Streptomycetaceae     | 5.37  | 0.76 | 3.01  | 3.0    |
|               | Micrococcaceae        | 3.2   | 1.92 | 1.84  | 2.3    |
|               | Sporichthyaceae       | 0.57  | 0.33 | 1.76  | 0.9    |
|               | Micromonosporaceae    | 1.44  | 0.52 | 0.58  | 0.8    |
|               | Streptosporangiaceae  | 1.98  | 0.24 | 0.1   | 0.8    |
|               | Propionibacteriaceae  | 1.65  | 0.2  | 0.25  | 0.7    |
|               | Mycobacteriaceae      | 1.11  | 0.08 | 0.35  | 0.5    |
|               | unclassified          | 0.31  | 0.04 | 0.95  | 0.4    |
|               | Microbacteriaceae     | 0.55  | 0.19 | 0.32  | 0.4    |
|               | Geodermatophilaceae   | 0.09  | 0.14 | 0.78  | 0.3    |
|               | Frankiaceae           | 0.75  | 0.06 | 0.1   | 0.3    |
|               | Nocardiodaceae        | 0.39  | 0.05 | 0.23  | 0.2    |
|               | Nakamurellaceae       | 0.29  | 0.07 | 0.07  | 0.1    |
|               | Corynebacteriaceae    | 0.3   | 0.05 | 0.01  | 0.1    |
|               | uncultured            | 0.16  | 0.02 | 0.06  | 0.08   |
|               | Cryptosporangiaceae   | 0.08  | 0.06 | 0.07  | 0.07   |
|               | Actinomycetaceae      | 0.17  | 0    | 0     | 0.06   |
|               | Glycomycetaceae       | 0.02  | 0    | 0.04  | 0.02   |
|               | Kineosporiaceae       | 0.03  | 0    | 0.01  | 0.01   |
|               | Acidothermaceae       | 0     | 0    | 0.02  | 0.007  |
|               | Promicromonosporaceae | 0     | 0.01 | 0.01  | 0.007  |
|               | Dermacoccaceae        | 0     | 0    | 0.01  | 0.003  |
|               | Gordoniaceae          | 0     | 0.01 | 0     | 0.003  |
|               | Intrasporangiaceae    | 0     | 0.01 | 0     | 0.003  |
|               | Actinospicaceae       | 0     | 0    | 0.001 | 0.0003 |
